# Supplementary material
Source: PubMed Central journal article supplement (PMC2662933)

**Imbalance between cysteine proteases and inhibitors in a baboon model of  
bronchopulmonary dysplasia\***

Ozden Altıok, Ryuji Yasumatsu, Gulbin Bingol-Karakoc, Richard J. Riese, Mildred T. Stahlman,  
William Dwyer, Richard A. Pierce, Dieter Bromme, Ekkehard Weber, and Sule Cataltepe

**ONLINE DATA SUPPLEMENT**

## **Methods**

### *Antibodies*

Cathepsin B antibody was purchased from Athens Research and Technology, Inc (Athens, GA). Cystatin C and CD68 antibodies were purchased from Dakocytomation (Carpinteria, CA). Pro-surfactant protein C (Pro-SPC) antibody was purchased from Chemicon International (Temecula, CA). Cathepsin L (mAb 33/1), cat K, cat S, and cat H antibodies were generated and characterized as previously described (1-6). Cystatin B antibody, clone 4A10 was raised and characterized as previously described (7) (Figure E1). Mouse and rabbit primary antibody isotype controls were purchased from Zymed Laboratories (South San Francisco, CA). For immunoblotting, the primary antibodies were used at the following dilutions: anti- cat B, 1:3000; anti-cat H, 1:1000; anti-cat K, 1:1000; anti-cat L, 1:2500; anti-cat S, 1:1000; cystatin B, 1:2000; cystatin C, 1:1000. For immunohistochemistry, the primary antibodies were used at the following dilutions: anti-cat B, 1:800; anti-cat H, 1:1000; anti-cat L, 1:1000; anti-cat S at 1:400; anti-cystatin B, 1:200; anti-CD68, 1:100; anti-SPC, 1:1000.

## References

- E1. Weber, E., Bahn, H., and Gunther, D. (1997) Monoclonal antibodies against cathepsin L and procathepsin L of different species, *Hybridoma* 16, 159-66.
- E2. Tolosa, E., Li, W., Yasuda, Y., Wienhold, W., Denzin, L. K., Lautwein, A., Driessen, C., Schnorrer, P., Weber, E., Stevanovic, S., Kurek, R., Melms, A., and Bromme, D. (2003) Cathepsin V is involved in the degradation of invariant chain in human thymus and is overexpressed in myasthenia gravis, *J Clin Invest* 112, 517-26.
- E3. Bromme, D., Okamoto, K., Wang, B. B., and Biroc, S. (1996) Human cathepsin O2, a matrix protein-degrading cysteine protease expressed in osteoclasts. Functional expression of human cathepsin O2 in *Spodoptera frugiperda* and characterization of the enzyme, *J Biol Chem* 271, 2126-32.
- E4. Fiebiger, E., Meraner, P., Weber, E., Fang, I. F., Stingl, G., Ploegh, H., and Maurer, D. (2001) Cytokines regulate proteolysis in major histocompatibility complex class II-dependent antigen presentation by dendritic cells, *J Exp Med* 193, 881-92.
- E5. Nissler, K., Strubel, W., Kreusch, S., Rommerskirch, W., Weber, E., and Wiederanders, B. (1999) The half-life of human procathepsin S, *Eur J Biochem* 263, 717-25.
- E6. Hou, W. S., Li, W., Keyszer, G., Weber, E., Levy, R., Klein, M. J., Gravallesse, E. M., Goldring, S. R., and Bromme, D. (2002) Comparison of cathepsins K and S expression within the rheumatoid and osteoarthritic synovium, *Arthritis Rheum* 46, 663-74.
- E7. Alakurtti, K., Weber, E., Rinne, R., Theil, G., Haan, G. J., Lindhout, D., Salmikangas, P., Saukko, P., Lahtinen, U., and Lehesjoki, A. E. (2004) Loss of lysosomal association of cystatin B proteins representing progressive myoclonus epilepsy, EPM1, mutations, *Eur J*

*Hum Genet.*

## **Figure Legend for online supplement**

**Figure E1.** Specificity of monoclonal anti-cystatin B antibody, clone 4A10. Monoclonal antibodies against cystatin B were raised as previously described (34). Epitope mapping revealed that MAb, clone 4A10 recognized the same epitope (-ENKKFPVFK-) as the previously characterized MAb, clone 2E7 (34). To determine if 4A10 cross-reacts with cystatin A, recombinant cystatin A and B proteins were separated by SDS-PAGE, transferred to nitrocellulose membranes, and detected by using the anti-cystatin B Mabs, clones 2E7, 4A10, 4C1, IA1, or an anti-cystatin A MAb.

**Figure E2.** Pro-SPC and cat H immunoreactivity on serial sections from a BPD group baboon lung sample. Arrows indicate type 2 alveolar epithelial cells. Scale bar, 100  $\mu$ m.

**Table E1.** Oligonucleotide primers used in quantitative PCR reactions

| <b>Gene</b> | <b>Forward primer</b>          | <b>Reverse Primer</b>          |
|-------------|--------------------------------|--------------------------------|
| Cathepsin B | 5'-TGTGTATTCCGACTTCCTGCT-3'    | 5'-GTGTGCCATTCTCCACTCC-3'      |
| Cathepsin H | 5'-CATTTGCCAGCAACTGGAGGAA-3'   | 5'-ATTGGTTCAGTGCCATTTTAAATG-3' |
| Cathepsin K | 5'-TGAGGCTTCTCTTGGTGTCCATAC-3' | 5'-AAAGGGTGTCACTTACTGCGGG-3'   |
| Cathepsin L | 5'-ACCAAGTGGAAGGCGATG-3'       | 5'-TCCCTTCCCTGTATTCTG-3'       |
| Cathepsin S | 5'-ACTCAGAATGTGAATCATGGTG-3'   | 5'-TTCTTGCCATCCGAATATATCC-3'   |
| Cystatin B  | 5'-GTTTAAGGCCGTGTCATTCA-3'     | 5'-GCTTTGTTGGTCTGGTAGTT-3'     |
| Cystatin C  | 5'-TCTTTCCAGATCTACGCTGTGC-3'   | 5'-TGGGAGGTGTGCATAAGAGGT       |
| CD 68       | 5'-CAACAAGCAATAGCACTGCCACCA-3' | 5'-TGTTGGATGAACCGTGGCATTTC-3'  |
| GAPDH       | 5'-GGTGGTCTCCTCTGACTTC-3'      | 5'-CTCTCCTCTTGTGCTCTTG-3'      |

**Figure E1**

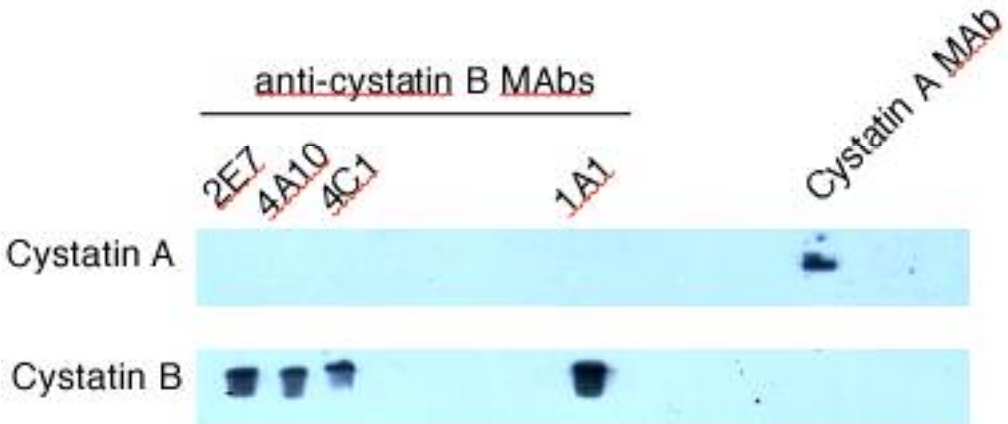

**Figure E2**

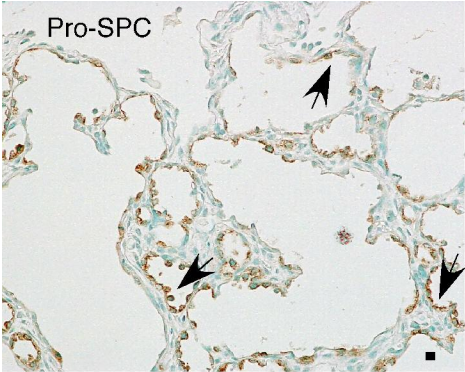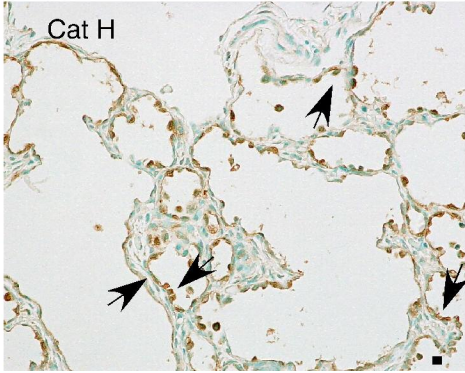

Supplement: supp_173_3_318__1.pdf [file supp_173_3_318__1.pdf]
